# Supplementary material for: Facile synthesis and luminescence properties of monodisperse lutetium oxide nanostructures with adjustable particle sizes
Source: Royal Society of Chemistry journal article supplement (doi:10.1039/d1ce00702e), 2021-01-01
Supplement: d1ce00702e1.pdf [file d1ce00702e1.pdf]

## **Electronic Supplementary Information (ESI)**

### **Facile synthesis and luminescence properties of monodisperse lutetium oxide nanostructures with adjustable particle sizes**

**Jie Tang, Cuimiao Zhang\*, Xiaomeng Lou, Ziman Yu, Xiaomeng Jia, Guang Jia\***

*Key Laboratory of Medicinal Chemistry and Molecular Diagnosis of the Ministry of Education, Key Laboratory of Chemical Biology of Hebei Province, College of Chemistry and Environmental Science, Hebei University, Baoding 071002, PR China*

\* Corresponding authors. Tel.: +86 312 5079359. Fax: +86 312 5079359

*E-mail address:* cmzhanghbu@163.com (C. Zhang), guangjia2001@163.com (G. Jia).

## Experimental section

### *Chemicals and materials*

The rare earth oxides including  $\text{Lu}_2\text{O}_3$ ,  $\text{Eu}_2\text{O}_3$ ,  $\text{Yb}_2\text{O}_3$ ,  $\text{Er}_2\text{O}_3$ ,  $\text{Ho}_2\text{O}_3$ , and  $\text{Tb}_4\text{O}_7$  with high purity (99.99%) were purchased from Sinopharm Chemical Reagent Co. Ltd, China. The above rare earth oxides were dissolved in dilute  $\text{HNO}_3$  solution and then removed the residual  $\text{HNO}_3$  by heating and evaporation to form clear solution of the corresponding rare earth nitrates. All other chemicals were analytical grade reagents and used directly without further purification.

### *Characterizations*

X-ray powder diffraction patterns (XRD) were examined on D8 Advance diffractometer diffractometer at a scan rate of  $13^\circ/\text{min}$  in the  $2\theta$  range from  $10^\circ$  to  $80^\circ$  (Bruker). Fourier transform infrared spectroscopy (FT-IR) spectra were examined on a Perkin-Elmer 580B infrared spectrophotometer in the range of  $4000\text{--}400\text{ cm}^{-1}$ . The morphology and composition was recorded using scanning electron microscope (SEM; JSM-7500F, JEOL). Thermogravimetric analysis and differential scanning calorimetry (TGA-DSC) data were recorded with a thermal analysis instrument (SDT 2960, TA Instruments, New Castle, DE) at the heating rate of  $10\text{ }^\circ\text{C min}^{-1}$  in an air flow of  $100\text{ mL min}^{-1}$ . The down-conversion (DC) and up-conversion (UC) luminescence spectra were obtained using a 150 W xenon lamp or 980 NIR laser as the excitation source and detected by Hitachi F-7000 fluorescence spectrometer from 400 to 900 nm. The photoluminescence decay curves and quantum yield were recorded by the FS5 spectrophotometer (Edinburgh) integrated steady-state transient fluorescence spectrometer. The life of the radiant energy level is estimated by fitting as an exponential function of the attenuation curve. The electroluminescence (EL) spectrum of the as-fabricated LED device was recorded on a high accuracy array rapid spectroradiometer equipped with an integrating sphere (illumia®Plus2, HalfMoon). All the measurements were performed at room temperature.

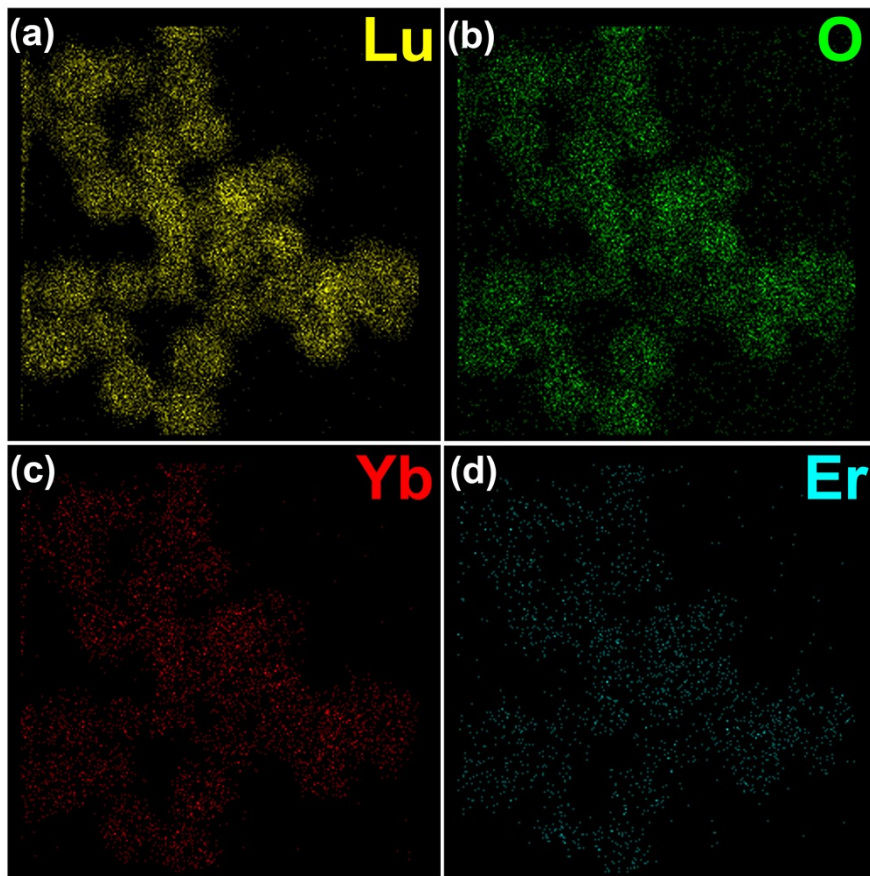

**Fig. S1.** EDX elemental mapping images for Lu, Yb, Er, and O in  $\text{Lu}_2\text{O}_3:\text{Yb}^{3+},\text{Er}^{3+}$  sample.

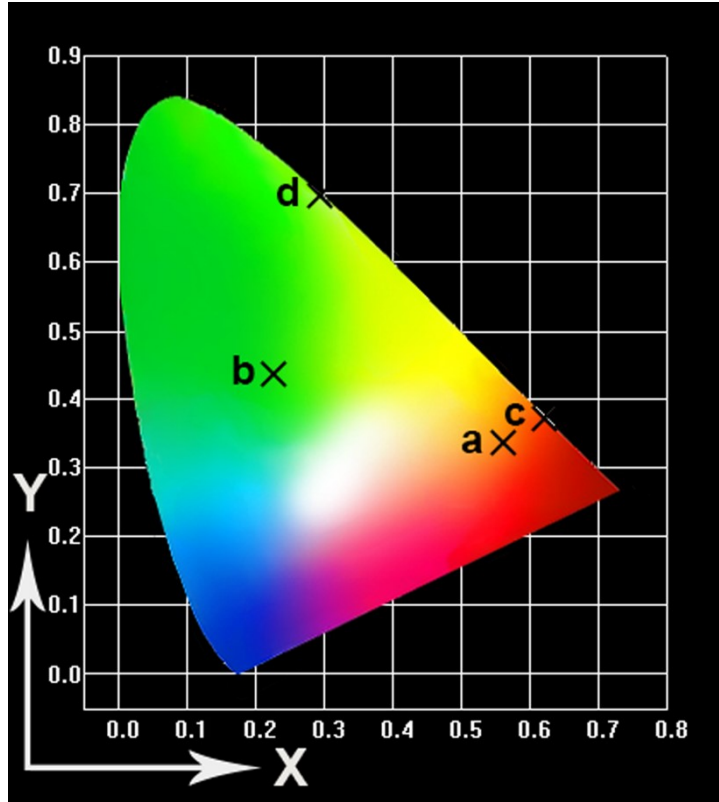

**Fig. S2.** CIE chromaticity diagram of (a)  $\text{Lu}_2\text{O}_3:\text{Eu}^{3+}$ , (b)  $\text{Lu}(\text{OH})\text{CO}_3:\text{Tb}^{3+}$ , (c)  $\text{Lu}_2\text{O}_3:\text{Yb}^{3+}, \text{Er}^{3+}$ , and (d)  $\text{Lu}_2\text{O}_3:\text{Yb}^{3+}, \text{Ho}^{3+}$  samples.

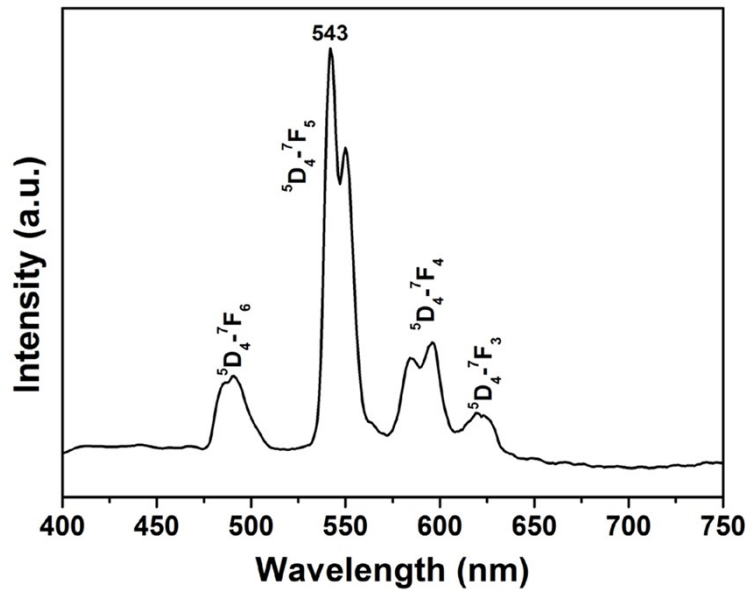

**Fig. S3.** PL emission spectra of 5mol% $\text{Tb}^{3+}$ -doped sample calcined at 800 °C for 2h in an Ar atmosphere.

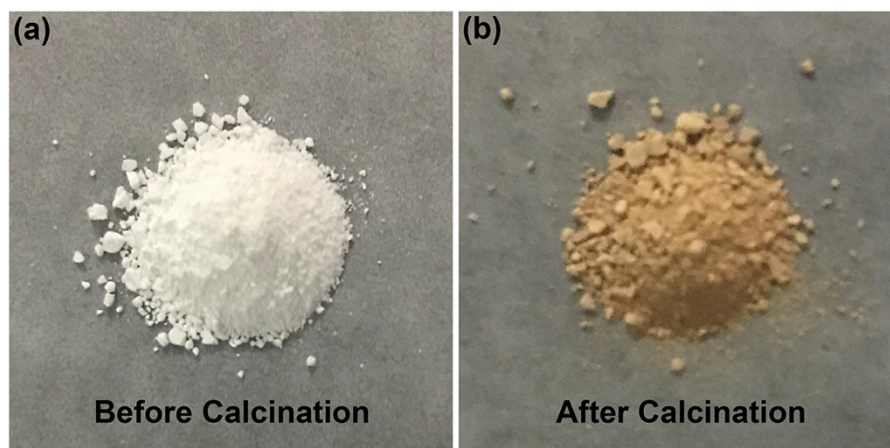

**Fig. S4.** The digital photos of the Tb doped samples (a) before and (b) after calcination at 800 °C for 2h in air.

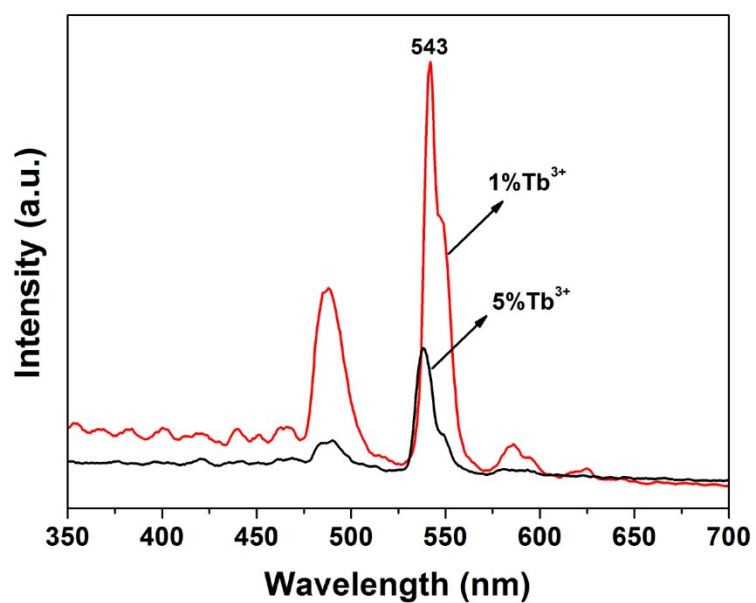

**Fig. S5.** PL emission spectra of Tb doped L17-800 samples with different doping concentrations.
